# Supplementary material for: Natural Cyanobacteria Removers Obtained from Bio-Waste Date-Palm Leaf Stalks and Black Alder Cone-Like Flowers
Source: MDPI journal article supplement (doi:10.3390/ijerph19116639), 2022-05-29
Supplement: s1 [file s1]

### S1\_Additional information about textural properties.

**Table S1.** The ratios of the specific volume of micropores ( $V_{mic}$ ) were calculated by different methods and the specific volumes of mesopores calculated from the adsorption  $V_{meso}$  (ads) and desorption  $V_{meso}$  (des) branches.

| $V_{mic}$ metod calculation    | C AC   |         |         | A AC   |         |         |
|--------------------------------|--------|---------|---------|--------|---------|---------|
|                                | t-plot | DR [27] | HK [28] | t-plot | DR [27] | HK [28] |
| $V_{mic}/V_{meso}(\text{ads})$ | 8.0    | 7.4     | 7.6     | 2.5    | 1.9     | 2.0     |
| $V_{mic}/V_{meso}(\text{des})$ | 4.6    | 4.3     | 4.4     | 1.9    | 1.5     | 1.6     |
