# Supplementary material for: Natural Cyanobacteria Removers Obtained from Bio-Waste Date-Palm Leaf Stalks and Black Alder Cone-Like Flowers
Source: MDPI journal article supplement (doi:10.3390/ijerph19116639), 2022-05-29
Supplement: s1 [file s1]

## S2\_Quantitative analysis of Cyanobacteria in Aleksandrovac Lake during 2020.

**Table S2.** Quantitative analysis of Cyanobacteria in Aleksandrovac Lake during 2020.

| Year                            | 2020          |               |               |               |                |                |                |                |                |                |               |               |
|---------------------------------|---------------|---------------|---------------|---------------|----------------|----------------|----------------|----------------|----------------|----------------|---------------|---------------|
| Month                           | January       | February      | March         | April         | May            | June           | July           | August         | September      | October        | November      | December      |
| Cyanobacteria                   | [cell/mL]     |               |               |               |                |                |                |                |                |                |               |               |
| <i>Anabaenopsis elenkinii</i>   | 1652          | 0             | 0             | 0             | 5507           | 5120           | 4800           | 5199           | 2599           | 0              | 2599          | 4130          |
| <i>Anathece minutissima</i>     | 0             | 0             | 11328         | 14160         | 18880          | 23405          | 10971          | 17824          | 11883          | 0              | 0             | 0             |
| <i>Aphanocapsa sp.</i>          | 11328         | 1634          | 7552          | 9440          | 6293           | 35107          | 10971          | 11883          | 17824          | 11883          | 5941          | 37760         |
| <i>Glaucospira sp.</i>          | 16363         | 8169          | 141757        | 145927        | 70144          | 210645         | 50286          | 1222785        | 1071655        | 200517         | 26983         | 52117         |
| <i>Jaaginema subtilissimum</i>  | 110504        | 20824         | 86487         | 77221         | 494906         | 377534         | 320108         | 275439         | 317814         | 40628          | 155521        | 121471        |
| <i>Limnothrix planctonica</i>   | 208860        | 331943        | 215232        | 242136        | 208860         | 517542         | 888686         | 353356         | 380538         | 256291         | 418487        | 137883        |
| <i>Merismopedia glauca</i>      | 1416          | 5991          | 1416          | 1770          | 4720           | 8777           | 4114           | 5941           | 14853          | 11883          | 2228          | 3540          |
| <i>Microcystis aeruginosa</i>   | 0             | 0             | 0             | 0             | 0              | 5851           | 10971          | 2971           | 0              | 0              | 5941          | 0             |
| <i>Microcystis flos-aquae</i>   | 0             | 0             | 0             | 0             | 0              | 5851           | 5486           | 2971           | 5941           | 0              | 0             | 0             |
| <i>Oscillatoria limosa</i>      | 7080          | 0             | 18880         | 23600         | 41300          | 25599          | 24686          | 14482          | 14482          | 27478          | 26736         | 0             |
| <i>Planktolyngbya limnetica</i> | 7080          | 0             | 28084         | 25075         | 82600          | 0              | 10286          | 47530          | 11883          | 5941           | 0             | 8260          |
| <i>Pseudanabaena limnetica</i>  | 79296         | 85777         | 10384         | 6490          | 147107         | 40959          | 10286          | 9655           | 4827           | 5199           | 100259        | 429520        |
| <i>Raphidiopsis raciborskii</i> | 37018         | 2781          | 96423         | 106832        | 87882          | 666101         | 1425306        | 1882212        | 1186793        | 467874         | 106200        | 37974         |
| <i>Snowella sp</i>              | 2360          | 4357          | 2360          | 1475          | 7867           | 11702          | 10971          | 11883          | 17824          | 22280          | 11883         | 9440          |
| <i>Synechocystis</i>            | 1652          | 681           | 4956          | 2065          | 11013          | 0              | 9600           | 2228           | 4456           | 0              | 0             | 4720          |
| <b>SUM</b>                      | <b>484608</b> | <b>462156</b> | <b>624859</b> | <b>656190</b> | <b>1156399</b> | <b>1934194</b> | <b>2797528</b> | <b>3866357</b> | <b>3063370</b> | <b>1049973</b> | <b>862779</b> | <b>846814</b> |
