# Supplementary material for: Natural Cyanobacteria Removers Obtained from Bio-Waste Date-Palm Leaf Stalks and Black Alder Cone-Like Flowers
Source: MDPI journal article supplement (doi:10.3390/ijerph19116639), 2022-05-29
Supplement: s1 [file s1]

### S3\_Quantitative analysis of Cyanobacteria in Aleksandrovac Lake during 2021.

**Table S3.** Quantitative analysis of Cyanobacteria in Aleksandrovac Lake during 2021.

| Year                            | 2021          |               |               |               |                |                |                |                |                |                |                |               |
|---------------------------------|---------------|---------------|---------------|---------------|----------------|----------------|----------------|----------------|----------------|----------------|----------------|---------------|
| Month                           | January       | February      | March         | April         | May            | June           | July           | August         | September      | October        | November       | December      |
| Cyanobacteria                   | [cell/mL]     |               |               |               |                |                |                |                |                |                |                |               |
| <i>Anabaenopsis elenkinii</i>   | 2065          | 3304          | 4956          | 0             | 8260           | 6144           | 4800           | 280            | 5199           | 2599           | 2599           | 0             |
| <i>Anathece minutissima</i>     | 0             | 0             | 0             | 9440          | 28320          | 28086          | 32914          | 1280           | 17824          | 0              | 0              | 4720          |
| <i>Aphanocapsa sp.</i>          | 47200         | 15104         | 11328         | 9440          | 9440           | 42129          | 10971          | 640            | 23765          | 5941           | 11883          | 9440          |
| <i>Glaucospira sp.</i>          | 62540         | 24544         | 40907         | 177197        | 105217         | 252774         | 125714         | 49150          | 1249256        | 401035         | 40475          | 140420        |
| <i>Jaaginema subtilissimum</i>  | 173529        | 138129        | 207194        | 108109        | 742359         | 453041         | 280094         | 1050812        | 360189         | 60942          | 194401         | 104429        |
| <i>Limnothrix planctonica</i>   | 156026        | 231138        | 208860        | 269040        | 313290         | 621051         | 938057         | 1018116        | 394128         | 300479         | 461190         | 225814        |
| <i>Merismopedia glauca</i>      | 1770          | 2832          | 2832          | 1770          | 7080           | 10532          | 8229           | 842052         | 17824          | 11883          | 4456           | 1770          |
| <i>Microcystis aeruginosa</i>   | 0             | 0             | 0             | 0             | 0              | 7021           | 5486           | 63193          | 0              | 0              | 2971           | 2950          |
| <i>Microcystis flos-aquae</i>   | 0             | 0             | 0             | 0             | 0              | 7021           | 5486           | 17554          | 8912           | 0              | 0              | 0             |
| <i>Oscillatoria limosa</i>      | 0             | 7080          | 14160         | 23600         | 61950          | 30719          | 49371          | 14043          | 14482          | 13739          | 13368          | 20650         |
| <i>Planktolyngbya limnetica</i> | 4130          | 7080          | 7080          | 35105         | 123900         | 0              | 30857          | 129898         | 17824          | 11883          | 0              | 14160         |
| <i>Pseudanabaena limnetica</i>  | 414180        | 92512         | 49560         | 12980         | 220660         | 49150          | 20571          | 59683          | 19309          | 10397          | 94689          | 61950         |
| <i>Raphidiopsis raciborskii</i> | 44303         | 41131         | 71980         | 120529        | 131823         | 799321         | 1316529        | 1330286        | 1222785        | 623832         | 159300         | 132160        |
| <i>Snowella sp</i>              | 4720          | 3540          | 4720          | 2950          | 5900           | 14043          | 10971          | 484483         | 29706          | 89119          | 23765          | 14160         |
| <i>Synechocystis</i>            | 0             | 3304          | 1652          | 6195          | 8260           | 0              | 4800           | 31597          | 2228           | 0              | 3713           | 4425          |
| <b>SUM</b>                      | <b>910463</b> | <b>569699</b> | <b>625229</b> | <b>776354</b> | <b>1766458</b> | <b>2321032</b> | <b>2844850</b> | <b>5093067</b> | <b>3383430</b> | <b>1531849</b> | <b>1012810</b> | <b>737048</b> |
