# Supplementary material for: Natural Cyanobacteria Removers Obtained from Bio-Waste Date-Palm Leaf Stalks and Black Alder Cone-Like Flowers
Source: MDPI journal article supplement (doi:10.3390/ijerph19116639), 2022-05-29
Supplement: s1 [file s1]

### Micropores (Horvath and Kawazoe)

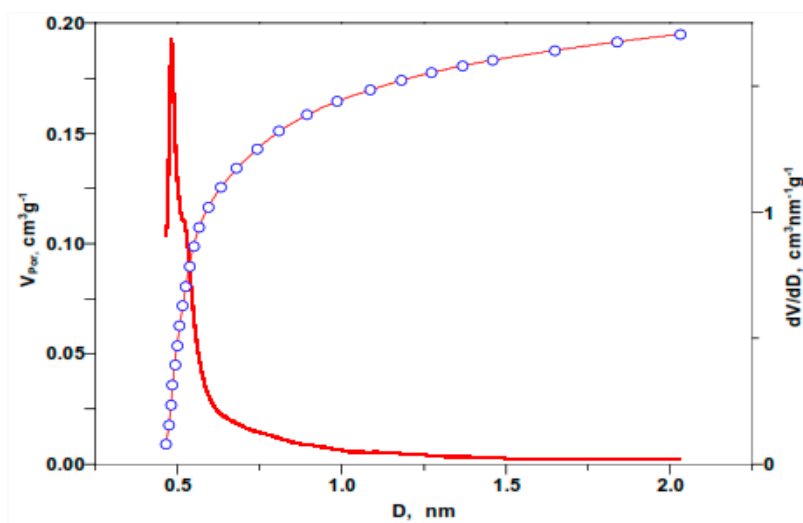

#### 2021.03.24. A\_AC BI 1-0.38

Calculations from  $p/p^0$  0 to 0.2

with potential function: Nitrogen on Graphite @77.3 K

from literature: G. Horvath, K. Kawazoe, J. Chem. Eng. Japan, 16, 6(1983), 470-475

Calculation with a molecular area of  $16.2 \text{ \AA}^2$

molecular weight of  $28.01 \text{ g/mol}$

and liquid density of  $0.8086 \text{ g cm}^{-3}$

Median pore diameter  $0.5473 \text{ nm}$

Maximum pore diameter  $0.4825 \text{ nm}$

Cumulative pore volume  $0.1949 \text{ cm}^3\text{g}^{-1}$

### ***Micropores (Horvath and Kawazoe)***

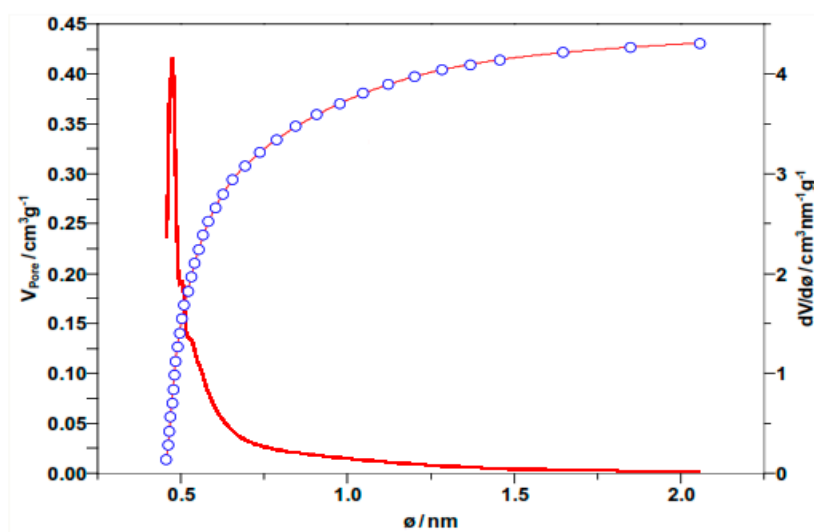

#### **2021.03.12. C\_AC BI 1-0.38**

Calculations from  $p/p^0$  0 to 0.2

with potential function: Nitrogen on Graphite @77.3 K

from literature: G. Horvath, K. Kawazoe, J. Chem. Eng. Japan, 16, 6(1983), 470-475

Calculation with a molecular area of  $16.2 \text{ \AA}^2$

molecular weight of  $28.01 \text{ g/mol}$

and liquid density of  $0.8086 \text{ g cm}^{-3}$

Median pore diameter  $0.5461 \text{ nm}$

Maximum pore diameter  $0.4753 \text{ nm}$

Cumulative pore volume  $0.4309 \text{ cm}^3 \text{ g}^{-1}$

**Figure S1. The original pages of the report that contain the distribution of micropores according to the Horvat-Kavozao model.**
